# Supplementary material
Source: PubMed Central journal article supplement (PMC6281776)
Supplement: NIHMS1508487-supplement-1.pdf [file NIHMS1508487-supplement-1.pdf]

- 1 Table S1. The best crystallization conditions for YrlA constructs. Related to STAR
- 2 Method and Table 1.

|                            | YrlA WT                                                                                            | YrlA Tetraloop                                                                                                    | YrlA Tetraloop 3C                                                                        |
|----------------------------|----------------------------------------------------------------------------------------------------|-------------------------------------------------------------------------------------------------------------------|------------------------------------------------------------------------------------------|
| Space group                | I4                                                                                                 | C222 <sub>1</sub>                                                                                                 | P6 <sub>3</sub>                                                                          |
| Diffraction limit          | 4.9 Å                                                                                              | 3.0 Å                                                                                                             | 5.0 Å                                                                                    |
| Crystallization conditions | 0.05M Sodium<br>Cacodylate pH6.0<br>10mM MgSO <sub>4</sub><br>1.8M Li <sub>2</sub> SO <sub>4</sub> | 0.05M Sodium<br>Succinate pH5.5<br>20mM MgCl <sub>2</sub><br>3.0M (NH <sub>4</sub> ) <sub>2</sub> SO <sub>4</sub> | 0.05M Sodium<br>Cacodylate pH6.5<br>0.2M KCl<br>0.1M Mg(OAc) <sub>2</sub><br>10% PEG8000 |

3

4

5 Figure S1. Quality of electron density maps. Related to Table 1 and Figure 1. (A)  
 6 Experimental electron density map from SAD phasing and solvent flattening (grey, 1  
 7  $\sigma$  level) with the final model overlaid (sticks). (B) and (D) 2Fo-Fc electron density  
 8 map (grey, 1  $\sigma$  level, sharpened with B-factor of  $-70\text{\AA}^2$ ) with the final model overlaid  
 9 (sticks). The boxed region is amplified in (D). (C) and (E) Simulated annealing (SA)  
 10 omit map (grey, 1  $\sigma$  level, sharpened with B-factor of  $-70\text{\AA}^2$ ) with the final model  
 11 overlaid (sticks). The map is generated with the standard composite omit map  
 12 procedure implemented in Phenix (torsion angle simulated annealing with 5% of  
 13 model omitted at a time). The boxed region is amplified in (E).

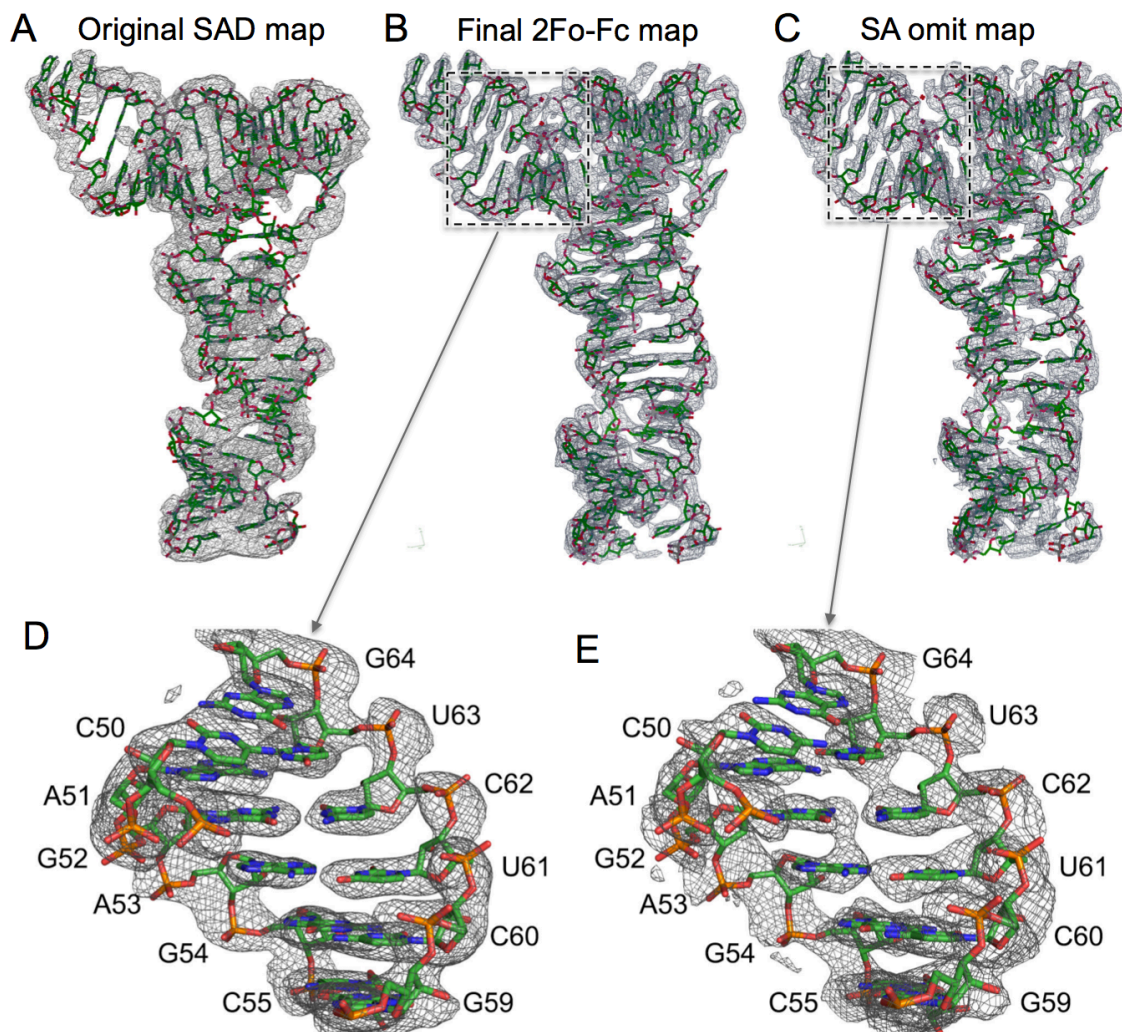

15 Figure S2. Crystal contacts of *S. Typhimurium* YrlA Tetraloop molecules. Related to  
16 Table 1 and Figure 1. (A) Packing of YrlA molecules perpendicular to the *a* axis. For  
17 clarity, only one layer of molecules in the unit cell is shown. The interactions include  
18 1) stacking interaction between symmetry-related AC/Connector stem termini of  
19 two neighboring molecules; 2) stacking interaction between symmetry-related base  
20 pair C40-G75 in the TSL-DSL regions of two neighboring molecules 3) hydrogen  
21 bonds between one <sup>56</sup>GAAA<sup>58a</sup> tetraloop and the TSL-DSL region of a symmetry  
22 related YrlA. (B) Crystal packing of YrlA molecules perpendicular to the *c* axis. Only  
23 one layer of molecules in the unit cell is shown. Interaction 4) consists of the minor  
24 groove surface of one YrlA T-stem packing against the Connector duplex of a  
25 symmetry-related YrlA molecule.

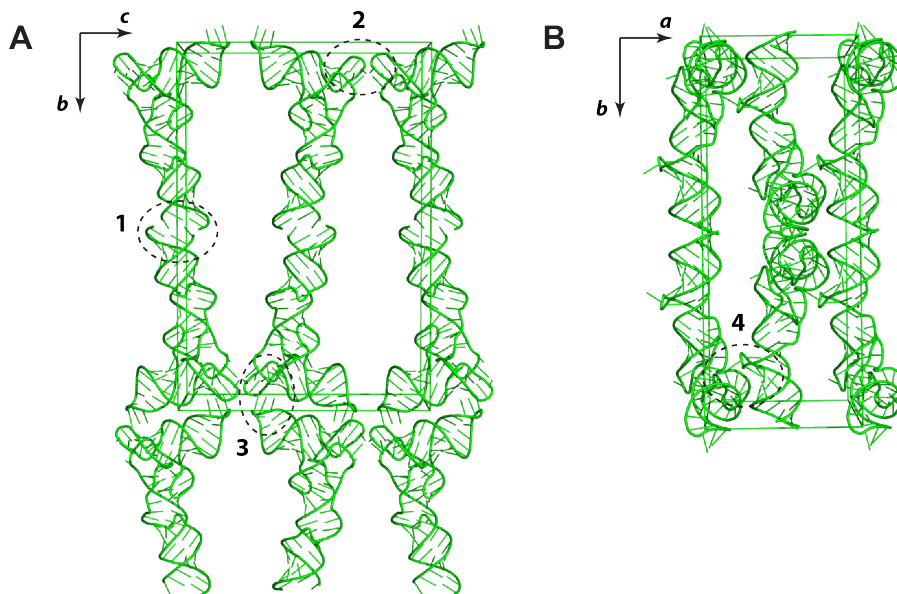

26
